# Supplementary material for: Impact of mineral dust on the global nitrate aerosol direct and indirect radiative effect
Source: Copernicus journal article supplement (doi:10.5194/egusphere-2024-1579), 2024-07-03
Supplement: Supplementary file [file egusphere-2024-1579-AC1-supplement.pdf]

## **Authors' response to comments made by anonymous reviewer #1:**

### **Summary**

*This manuscript presents a modeling effort to quantify the impact of mineral dust on radiative forcing effect of nitrate aerosol. Nitrate was believed to be a cooling aerosol although great uncertainties remain within the estimated radiative forcing. As the authors mentioned, nitrate is probably going to play a more important role due to the decrease in sulfate. In addition, mineral dust was known to affect the formation of nitrate aerosol through thermodynamic equilibrium and heterogeneous reactions. I strongly agree that a thorough investigation of the interaction between dust and nitrate and the associated radiative forcing effect will help to improve the understanding of climate change. Therefore, this study focused on an important and interesting topic and applied a proper modeling method. In general, the manuscript is well written with a clear description of the objective and well-organized discussions of the results. However, there are a few major issues regarding the modeling method which requires more details to help better justify and support the results and conclusion of this study. I would recommend a major revision to address these issues before a final decision could be made regarding the acceptance of the submission. Please find the major and minor comments below.*

We would like to thank the reviewer for his/her thoughtful review and positive response. Below is a point-by-point response (in black) to the major and minor comments (in blue).

### **Major Comments**

- 1. A main issue is that it seems this study didn't consider dust heterogeneous chemistry which may promote conversion from NO<sub>x</sub> to nitrate on the surface of dust particles. The "physicochemical interactions of mineral dust particles with gas and aerosol tracers" in this study refers to the thermodynamic equilibrium between gas-phase HNO<sub>3</sub> and particle phase nitrate if I understand the manuscript correctly. I am not quite sure which one of these two process, heterogeneous chemistry or thermodynamic equilibrium, plays a major role in dominating the production of nitrate in the present of dust as there is no such demonstration in this work. Similarly, dust heterogeneous chemistry also promotes conversion from gas phase SO<sub>2</sub> to sulfate which may further affect the thermodynamic equilibrium of HNO<sub>3</sub>. Therefore, as the topic focused on "impact of dust on the global nitrate", I would recommend the authors to include a brief discussion to explain that omitting dust heterogeneous chemistry may or may not affect the conclusion of this study.*

In addition to nitrate production on dust particles by thermodynamic equilibrium between gas-phase HNO<sub>3</sub> and particulate nitrate, this study also considers production via heterogeneous chemistry by hydrolysis of N<sub>2</sub>O<sub>5</sub>. It has been shown that this chemical formation pathway is the most dominant for heterogeneous nitrate production (Seisel et al., 2005; Tang et al., 2012), while others such as NO<sub>2</sub> oxidation do not show such high yields, although they are also important during dust pollution events over polluted regions (Li et al., 2024). The same is true for heterogeneous SO<sub>2</sub> oxidation and therefore it would not significantly affect the thermodynamic equilibrium of HNO<sub>3</sub> under most conditions. Consideration of sulphate production by heterogeneous chemistry

could theoretically result in reduced amounts of particulate nitrate in some cases due to acidification of dust particles, which inhibits partitioning of  $\text{HNO}_3$  to the aerosol phase (Nenes et al., 2020). More information on the heterogeneous nitrate production considered in this study has been added to the relevant part of Section 1 in the revised version. In addition, a disclaimer regarding the omission of full consideration of heterogeneous chemistry and its potential impact on our results has been added to Section 2.2 in the revised version.

- 2. The second main issue with the study is a lack of discussion about uncertainties of the REari and REaci estimations. Radiative forcing effect is a complex index calculated based on a series of model simulated variables, and it may subsequently inherit the associated uncertainties. For example, how were the model performances for simulating dust emission and size distribution, nitrate concentration, aerosol vertical distributions? These variables will significantly affect the estimations of REari and REaci, and a clear demonstration of modeling biases for these variables will help audiences to better understand the radiative effects quantified by the modeling system. Especially, many climate models represent formation of nitrate in a very simplified manner. Therefore, I am very interested to see how well the model used in this study can simulate mass concentration of nitrates as evaluated against observations.*

We acknowledge the lack of information on the ability of the model to accurately simulate the amounts of nitrate and dust aerosol in the atmosphere and agree with the reviewer that such an addition would indeed help readers to better assess the credibility of the study's conclusions. EMAC is routinely evaluated against ground-based, aircraft, and satellite observations of aerosol concentrations and composition, aerosol optical depth, acid deposition, gas-phase mixing ratios, cloud properties, and meteorological parameters (Tsimpidi et al., 2016, 2017; Karydis et al., 2016; Karydis et al., 2017; Bacer et al., 2018; Pozzer et al., 2022). Here, we have included in the supplementary material the zonal profiles for coarse and fine nitrate aerosols and for the mineral ions present in dust particles. We have also included a comparison of model results for surface concentrations of  $\text{PM}_{2.5}$  nitrate aerosols with observations from measurement networks in the most active regions of the polluted northern hemisphere (EANET, EMEP, EPA & IMPROVE).

## Minor Comments

- 1. Table 1 talks about details of simulation configuration, so it might be better to move it to section 2.*

Yes, this is true, as it essentially summarizes the last paragraph of Section 2.1. It has therefore been moved to the end of that section in the revised manuscript.

- 2. It's necessary to briefly describe the difference in ionic composition between Karydis et al. (2016) and global homogeneous setting.*

A detailed description of the ionic composition of both cases, namely Karydis et al. (2016) and Sposito (1989), is mentioned at the end of Section 2.1, along with the details of the other sensitivity

simulations performed. In the revised version, we have also added footnotes to Table 1 to make this information more visible to the reader.

3. *Better use math symbol instead of letter for “x”.*

This has been corrected in the revised version, where the grid resolution is entered as a mathematical equation instead of plain text.

4. *These “mineral ions” are treated as individual particles or as supplements of dust particle?*

These mineral ions are treated as individual species that are part of the aerosol in each size mode and are assumed to be well mixed with the rest of the aerosol species considered (i.e., dust, black carbon, organics, inorganic ions). In total, EMAC considers 7 particles described by lognormal size modes (four hydrophilic and three hydrophobic). The aerosol composition within each mode is uniform in size (internally mixed) but can vary between modes (externally mixed). This information has been added to the revised manuscript.

5. *Does “chemically inert” mean the gas-phase HNO<sub>3</sub> adsorbed onto the surface of dust particle will not partition into nitrate through equilibrium with NVCs?*

In the base case simulation, nitrate is formed by the rapid uptake of HNO<sub>3</sub> by dust particles due to simple acid–base interactions with the NVCs. In the “chemically inert” case, these interactions do not occur because there are no NVCs in the dust composition and therefore HNO<sub>3</sub> remains in the gas phase. This information is now included in the revised version.

6. *Do you mean 94% of emitted dust mass is treated as “bulk dust” in the model? The particle size distributions of dust and other ions are the same?*

Yes, exactly. In this sensitivity, 94 % of the emitted dust mass is treated as a bulk species in the model. The size distribution of the emitted dust mass remains the same as before, only the ionic composition is different. This clarification has been added in the revised version.

7. *Please include the function here to help illustrate the partition process and how it is represented in the model.*

The equation describing the diffusion gas flux on a single particle surface, which is essentially the amount of gas that can kinetically condense on it within a time step, as described in Vignati et al. (2004), has been added to the text at the beginning of Section 2.2 in the revised version.

8. *Freshly emitted species are usually NO<sub>x</sub> instead of HNO<sub>3</sub>.*

This is of course the case. It was not our intention to suggest that HNO<sub>3</sub> is a primary pollutant rather than a transported one, as stated in the figure caption. A reference to ‘freshly emitted nitric acid’ has been corrected to ‘freshly formed nitric acid’. We understand that the small dark/green arrows could possibly give the impression of a direct emission to the atmosphere, but our aim was

to imply only transport (they are also shown above the surface), as fresh emissions are represented by the thicker arrows coming from the 3 different emission categories at the surface.

9. *Please specify how exactly nitrate formation was turned off. Was gas phase HNO<sub>3</sub> still condense but no nitrate was produced, or HNO<sub>3</sub> is the end product of nitrous oxide?*

For these sensitivity simulations we have assumed that no HNO<sub>3</sub> is produced from NO<sub>2</sub> oxidation and N<sub>2</sub>O<sub>5</sub> hydrolysis. Therefore, in the model simulations with nitrate formation completely switched off, there is no HNO<sub>3</sub> in the atmosphere to condense in the aerosol via equilibrium partitioning and form nitrate. A clarification has been added at the beginning of Section 2.3.1 in the revised version.

10. *If HNO<sub>3</sub> was forced to condense only on fine mode, will this lead to a lower level of sulfate formation since the model need to keep the equilibrium? Will there be any non-linear response of other aerosols such as sulfate by tuning off condensation? If we set up a 4<sup>th</sup> simulation by forcing HNO<sub>3</sub> to condense only on coarse mode, can we estimate the radiative effect as:  $F_{\text{fineNO}_3, \text{ari}} = F_{1, \text{ari}} - F_{4, \text{ari}}$  ?*

The amount of nitric acid that would otherwise condense on the coarse mode remains in the gas phase. Since sulfuric acid has an extremely low vapor pressure, it will partition completely into the aerosol phase anyway. So, such a change in HNO<sub>3</sub> partitioning cannot lead to a non-linear response of sulfate aerosols. Finally, yes, theoretically, the direct radiative effect of fine nitrates can be calculated in a setup like the one proposed here, since it is a similar methodology to the one used in this study to calculate the coarse mode radiative effect. However, by allowing HNO<sub>3</sub> to condense only on the coarse mode, the results are more prone to errors due to kinetic limitations on the coarse particles, since the HNO<sub>3</sub> left in the gas phase by the missing condensation in the fine mode will be available to condense on the coarse particles, leading to an overestimation of nitrate.

11. *As there was no aerosol-cloud interaction, does it mean the simplest cloud scheme apply a prescribed aerosol configuration? Can it properly reproduce cloud over the study period?*

The cloud scheme used for all instances of the direct radiative effect calculations is a statistical cloud cover scheme using prognostic equations for the different water phases and distribution moments as described in Tompkins (2002) and also Roeckner et al. (2006). The bulk microphysics of the scheme follows the methodology of Lohmann and Roeckner (1996), where the cloud droplet number concentration (CDNC) is empirically related to the sulfate aerosol mass and more specifically its monthly mean values derived from the sulfur cycle in ECHAM. The detailed equations for the marine and continental CDNC can be found in Lohmann and Roeckner (1996), and more detailed information on the aerosol sulfate mass can be found in Boucher and Lohmann (1995) as well as Feichter et al., (1996). This information has now been added to the revised version. This particular scheme has indeed been proved to be able to accurately simulate cloud cover, although this particular aspect is not of major importance for the calculation of aerosol-radiation interactions.

*12. Model configuration for cloud scheme is a little confusing here, line#313 mentions FN,ari is calculated using method in sec2.3.1 which applied the simplest cloud scheme as mentioned in line#294, but it seems in order to estimate aci, another set of cloud scheme was used.*

As explained in Section 2.3.2, in order to calculate the indirect effect, we first estimate the feedback radiative effect of nitrates using two additional simulations for each sensitivity case, using the more advanced cloud scheme (described in Section 2.3.2). Indeed, the feedback and direct radiative effects were calculated with different cloud schemes, because for the latter it was necessary to eliminate any climatological influences, but for the former it was essential to include them. However, since the feedback effect could be considered as an estimate that includes both the direct and indirect effects, in order to isolate the indirect effect, we had to subtract the direct effect, as correctly calculated with the three initial simulations (Section 2.3.1).

*13. A table showing REari reported in these references would be helpful to better demonstrate the comparison.*

This is an excellent suggestion. A table comparing the estimates of the REari for total nitrate aerosols between this study and those referred to at the beginning of Section 3.1 has been added to the supplementary material of the manuscript, and the reader is referred to it in the revised version.

*14. Please explain why there is a strong warming dot over Sahara in Fig.2(v).*

The presence of this localized warming over the Sahara in the SW part of the spectrum is related to the interactions of nitrate aerosols with dust particles, in combination with the region itself. Because the underlying desert surface is so bright, its absorption is less than that of the particles above it at these wavelengths, which means that the surface of the desert can scatter radiation more effectively than the particles. This is amplified by particle growth there, as seen by the increase in the coarse mode wet radius over the Sahara in the presence of nitrates, which also means an increase in the absorption cross section of the particles. This leads to positive forcing in parts of the region and weak negative forcing in other parts. The explanation in the text has been changed in the revised version to better describe this interplay to the reader.

*15. It's a very interesting point that nitrate REari seems insensitive to dust load but Table 2 suggested that interaction between nitrate and dust has a significant impact on coarse mode aerosols' LW and SW forcing. It's better to include more detailed discussions in this paragraph to explain why "nitrate-dust interactions are not linearly correlated", and why "a given increase or decrease in dust emissions does not lead to an analogous change in nitrate aerosol level".*

In fact, the behavior of the nitrate REari is not insensitive to dust loading, as changes in this also led to altered estimates of the LW & SW forcing (Table 2). However, the changes are indeed more pronounced when considering the inclusion of dust chemistry. It is a good idea to include some more discussion of why this non-linear behavior exists, so that the reader has a broader understanding of the interactions between dust and nitrates. Therefore, an additional paragraph has been added at the end of Section 3.2 in the revised manuscript to cover this aspect. In short, the

amount of HNO<sub>3</sub> present over dust aerosol surface is mainly the limiting factor for nitrate production (due to adsorption on dust particles) than the amount of dust itself. Furthermore, in cases where more dust is present in the atmosphere, its increased removal rates by wet deposition and/or coagulation led to non-analogous increases in nitrate production.

#### 16. What is the “advanced cloud scheme” ?

The advanced cloud scheme refers to the one used in the two additional simulations from which the nitrate feedback radiative effect was estimated and is described at the end of Section 2.3.2. This clarification has been added in the revised version. More specifically, it is the scheme of Lohmann and Ferrachat (2010), which uses prognostic equations for the water phases and bulk cloud microphysics. It also uses the empirical cloud cover scheme of Sundqvist et al. (1989). In addition, it uses the CDNC activation scheme of Morales and Nenes (2014) for aerosol activation, which includes the adsorption activation of mineral dust as described in Karydis et al. (2017). Finally, the scheme of Barahona and Nenes (2009) is used for the ICNC activation, which calculates the ice crystal size distribution through heterogeneous and homogeneous freezing and ice crystal growth as described in Bacer et al. (2018).

## References

- Bacer, S., Sullivan, S. C., Karydis, V. A., Barahona, D., Kramer, M., Nenes, A., Tost, H., Tsimpidi, A. P., Lelieveld, J., and Pozzer, A.: Implementation of a comprehensive ice crystal formation parameterization for cirrus and mixed-phase clouds in the EMAC model (based on MESSy 2.53), *Geoscientific Model Development*, 11(10), <https://doi.org/10.5194/gmd-11-4021-2018>, 2018.
- Barahona, D. and Nenes, A.: Parameterizing the competition between homogeneous and heterogeneous freezing in cirrus cloud formation - monodisperse ice nuclei, *Atmospheric Chemistry and Physics*, 9(16), 369-381, <https://doi.org/10.5194/acp-9-5933-2009>, 2009.
- Boucher, O., & Lohmann, U.: The sulfate-CCN-cloud albedo effect. *Tellus B: Chemical and Physical Meteorology*, 47(3), 281-300, <https://doi.org/10.3402/tellusb.v47i3.16048>, 1995.
- Feichter, J., Kjellström, E., Rodhe, H., Dentener, F., Lelieveld, J., & Roelofs, G. J.: Simulation of the tropospheric sulfur cycle in a global climate model. *Atmospheric Environment*, 30(10-11), 1693-1707, [https://doi.org/10.1016/1352-2310\(95\)00394-0](https://doi.org/10.1016/1352-2310(95)00394-0), 1996.
- Karydis, V. A., Tsimpidi, A. P., Pozzer, A., Astitha, M., and Lelieveld, J.: Effects of mineral dust on global atmospheric nitrate concentrations, *Atmospheric Chemistry and Physics*, 16(3), 1491-1509, <https://doi.org/10.5194/acp-16-1491-2016>, 2016.
- Karydis, V. A., Tsimpidi, A. P., Bacer, S., Pozzer, A., Nenes, A., and Lelieveld, J.: Global impact of mineral dust on cloud droplet number concentration, *Atmospheric Chemistry and Physics*, 17(9), 5601-5621, <https://doi.org/10.5194/acp-17-5601-2017>, 2017.
- Li, X., Yu, Z., Yue, M., Liu, Y., Huang, K., Chi, X., ... & Wang, M.: Impact of mineral dust photocatalytic heterogeneous chemistry on the formation of the sulfate and nitrate: A modelling study over East Asia. *Atmospheric Environment*, 316, 120166, <https://doi.org/10.1016/j.atmosenv.2023.120166>, 2024.
- Lohmann, U. and Ferrachat, S.: Impact of parametric uncertainties on the present-day climate and on the anthropogenic aerosol effect, *Atmospheric Chemistry and Physics*, 10(23), <https://doi.org/10.5194/acp-10-11373-2010>, 2010.

- Morales Betancourt, R. and Nenes, A.: Understanding the contributions of aerosol properties and parameterization discrepancies to droplet number variability in a global climate model, *Atmospheric Chemistry and Physics*, 14(9), 4809-4826, <https://doi.org/10.5194/acp-14-4809-2014> , 2014.
- Nenes, A., Pandis, S. N., Weber, R. J., and Russell, A.: Aerosol pH and liquid water content determine when particulate matter is sensitive to ammonia and nitrate availability, *Atmos. Chem. Phys.*, 20, 3249–3258, <https://doi.org/10.5194/acp-20-3249-2020> , 2020.
- Pozzer, A., Reifenberg, S. F., Kumar, V., Franco, B., Kohl, M., Taraborrelli, D., Gromov, S., Ehrhart, S., Jöckel, P., Sander, R., Fall, V., Rosanka, S., Karydis, V., Akritidis, D., Emmerichs, T., Crippa, M., Guizzardi, D., Kaiser, J. W., Clarisse, L., Kiendler-Scharr, A., Tost, H., and Tsimpidi, A.: Simulation of organics in the atmosphere: evaluation of EMACv2.54 with the Mainz Organic Mechanism (MOM) coupled to the ORACLE (v1.0) submodel, *Geosci. Model Dev.*, 15, 2673–2710, <https://doi.org/10.5194/gmd-15-2673-2022> , 2022.
- Seisel, S., Börensen, C., Vogt, R., & Zellner, R.: Kinetics and mechanism of the uptake of N<sub>2</sub>O<sub>5</sub> on mineral dust at 298 K. *Atmospheric Chemistry and Physics*, 5(12), 3423-3432, <https://doi.org/10.5194/acp-5-3423-2005> , 2005.
- Sposito, G.: *The Chemistry of Soils*, Oxford University Press, New York, ISBN 9780190630881, 1989.
- Sundqvist, H., Berge, E., and Kristjánsson, J. E.: Condensation and Cloud Parameterization Studies with a Mesoscale Numerical Weather Prediction Model, *Monthly Weather Review*, 117(8), 1641-1657, [https://doi.org/10.1175/1520-0493\(1989\)117%3C1641:CACPSW%3E2.0.CO;2](https://doi.org/10.1175/1520-0493(1989)117%3C1641:CACPSW%3E2.0.CO;2) , 1989.
- Tang, M. J., Thieser, J., Schuster, G., & Crowley, J. N.: Kinetics and mechanism of the heterogeneous reaction of N<sub>2</sub>O<sub>5</sub> with mineral dust particles. *Physical Chemistry Chemical Physics*, 14(24), 8551-8561, <https://doi.org/10.1039/C2CP40805H>, 2012.
- Tsimpidi, A. P., Karydis, V. A., Pandis, S. N., and Lelieveld, J.: Global combustion sources of organic aerosols: model comparison with 84 AMS factor-analysis data sets, *Atmos. Chem. Phys.*, 16, 8939–8962, <https://doi.org/10.5194/acp-16-8939-2016> , 2016.
- Tsimpidi, A. P., Karydis, V. A., Pandis, S. N., and Lelieveld, J.: Global-scale combustion sources of organic aerosols: sensitivity to formation and removal mechanisms, *Atmos. Chem. Phys.*, 17, 7345–7364, <https://doi.org/10.5194/acp-17-7345-2017> , 2017.
- Vignati, E., Wilson, J., and Stier, P.: M7: An efficient size-resolved aerosol microphysics module for large-scale aerosol transport models, *Journal of Geophysical Research: Atmospheres*, 109(D22), <https://doi.org/10.1029/2003JD004485> , 2004.
